# Supplementary material for: A nitrogen-doped nano carbon dodecahedron with Co@Co3O4 implants as a bi-functional electrocatalyst for efficient overall water splitting
Source: Royal Society of Chemistry journal article supplement (doi:10.1039/c7ta01708a), 2017-01-01
Supplement: c7ta01708a1.pdf [file c7ta01708a1.pdf]

## Supplementary information

### **A nitrogen-doped nano carbon dodecahedron with Co@Co<sub>3</sub>O<sub>4</sub> implants as bifunctional electrocatalyst for efficient overall water splitting**

Chengdong Bai, Shanshan Wei, Dingrong Deng, Xiaodong Lin, Mingsen Zheng\* and  
Quanfeng Dong\*

Fax: (+86)0592-2183905; Tel: (+86)0592-2185905. State Key Laboratory for Physical Chemistry of Solid Surfaces, Department of Chemistry, College of Chemistry and Chemical Engineering, iChem (Collaborative Innovation Center of Chemistry for Energy Materials), Xiamen University, Xiamen 361005, China.

\*E-mail: qfdong@xmu.edu.cn, mszheng@xmu.edu.cn; Fax: (+86)0592-2183905; Tel: (+86)0592-2185905.

## Experimental Section

### Synthesis

**Synthesis of ZIF-67.** 4 mmol of  $\text{Co}(\text{NO}_3)_2 \cdot 6\text{H}_2\text{O}$  was dissolved in 50 mL of methanol, which was subsequently poured into 50 mL of methanol containing 16 mmol of 2-methylimidazole (MeIM). The solution was incubated at room temperature for 24 h after thorough mixing. Obtained precipitates were collected by centrifugation, washed with methanol for many times and dried in an oven at 80 °C for 12 h, resulting in the purple ZIF-67 crystals.

**Synthesis of Co-NC composites.** 0.5 g ZIF-67 crystals were carbonized under a  $\text{N}_2$  atmosphere at 700 °C for 3 h, with a heating rate of 5 °C·min<sup>-1</sup>, Co-NC was obtained after cooled down to room temperature naturally.

**Synthesis of Co@Co<sub>3</sub>O<sub>4</sub>-NC composites.** 60 mg Co-NC heat treated in air at 200 °C for 3 h to form Co@Co<sub>3</sub>O<sub>4</sub>-NC.

**Synthesis of Co<sub>3</sub>O<sub>4</sub>-NC composites.** 60 mg Co-NC was heat treated in air at 200 °C for 48 h to form Co<sub>3</sub>O<sub>4</sub>-NC.

### Characterization

X-ray diffraction (XRD) measurements were performed by using a Rigaku Ultima IV instrument using Cu K $\alpha$  radiation ( $\lambda=1.5418$  Å). Raman spectra were obtained using a XploRA Raman microscope with an excitation wavelength of 785 nm. X-ray photoelectron spectroscopy (XPS) measurements were performed on a PHI-5300 ESCA spectrometer (PerkinElmer) with an energy analyzer working in the pass energy mode at 35.75 eV. An Al K $\alpha$  line was used as the X-ray source. The morphologies were characterized by a scanning electron microscopy (Hitachi S-4800) and transmission electron microscopy (FEI Tecnai F30). The electro-performance was evaluated by an electrochemical workstation (CHI 760E) equipped with a rotation electrode equipment (PINE). Over all water splitting tests were conducted in a home-made device.

### Electrocatalytic performance analysis

The HER and OER polarization curves of all the catalysts was measured in 1 M KOH aqueous electrolyte using a rotating disk electrode (RDE) at room temperature (~25 °C). Catalyst loading is 0.4 mg cm<sup>-2</sup>. 4 mg of catalyst powder was dispersed in 400 µL of solution (5% Nafion solution: isopropyl alcohol: DI water = 1: 19: 19 in volume) and under ultrasonicated for least 40 min to form a homogeneous ink. 8 µL catalysts ink was dropped on a polished RDE (0.196 cm<sup>2</sup>). Cyclic voltammograms (CVs) and linear sweep voltammograms (LSVs) were recorded in a three-electrode electrolytic cell, RDE coating with catalysts as working electrode, a graphite rod as a counter electrode, and Hg/HgO as a reference electrode. All the measured potentials were converted to potentials versus to reversible hydrogen electrode (RHE), and the counter electrode was calibrated with a homemade RHE in hydrogen saturated 1 M KOH solution.

$$E_{\text{RHE}} = E + 0.0592\text{pH} + E^{\theta}(\text{Hg/HgO})$$

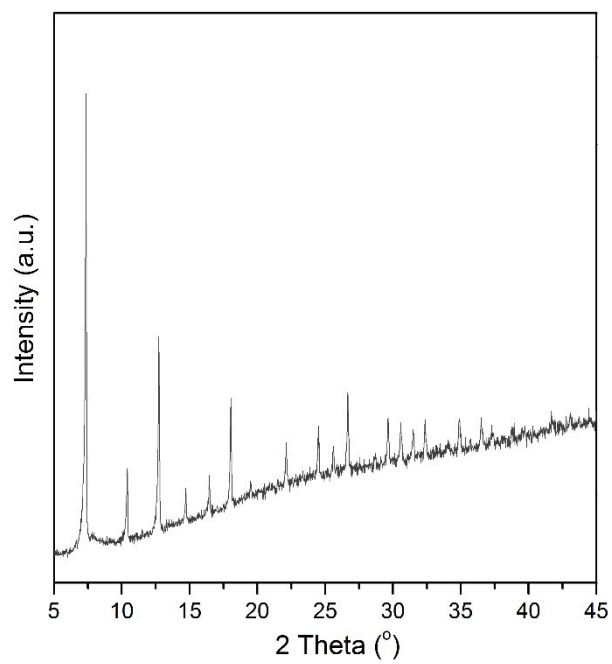

**Fig. S1.** The XRD patterns of ZIF-67.

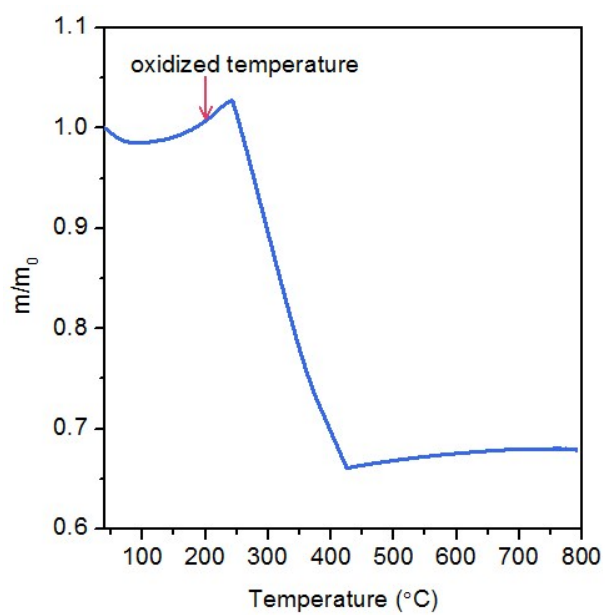

**Fig. S2.** The TG curve of Co-NC in air.

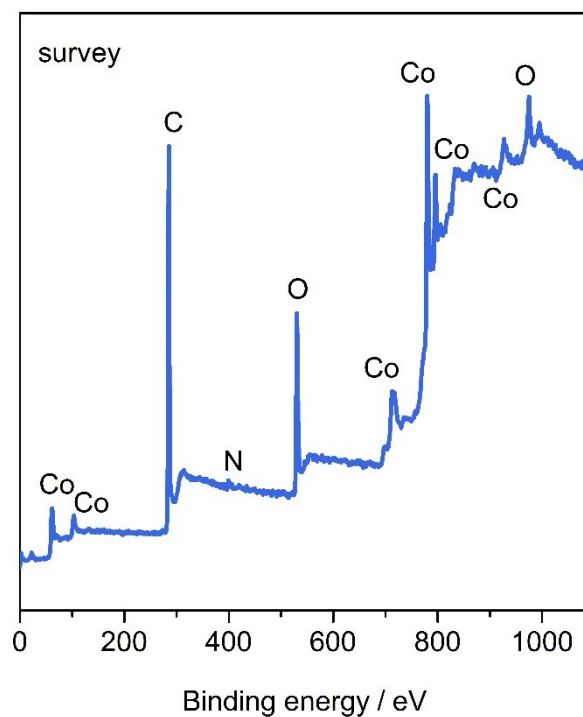

**Fig. S3.** The XPS survey of Co@Co<sub>3</sub>O<sub>4</sub>-NC.

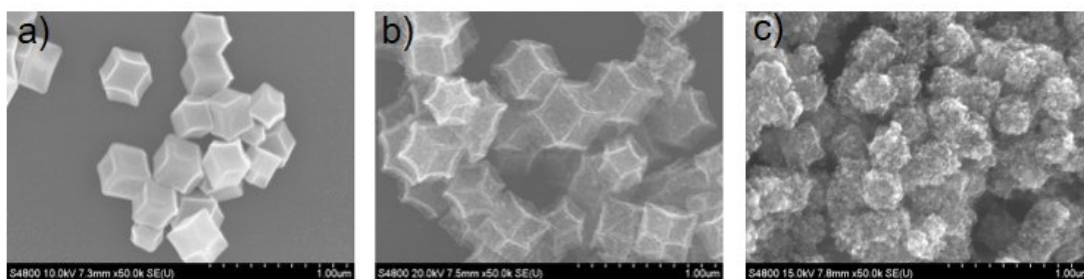

**Fig. S4.** SEM images of a) ZIF-67, b) Co-NC and c) Co<sub>3</sub>O<sub>4</sub>-NC.

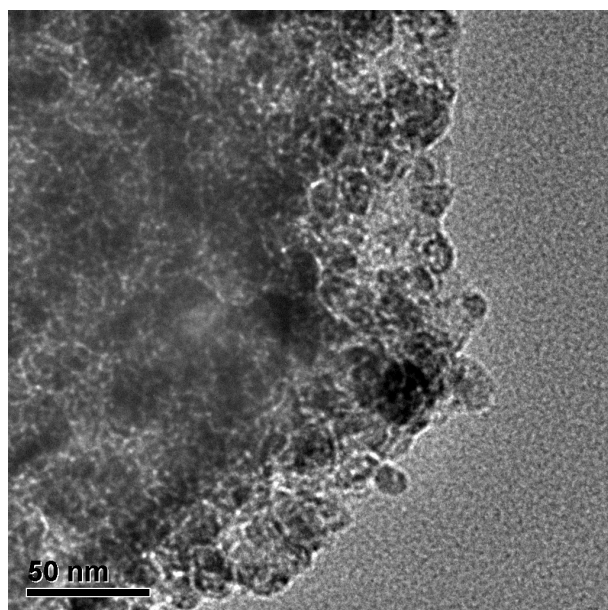

**Fig. S5.** The HRTEM image of Co@Co<sub>3</sub>O<sub>4</sub>-NC.

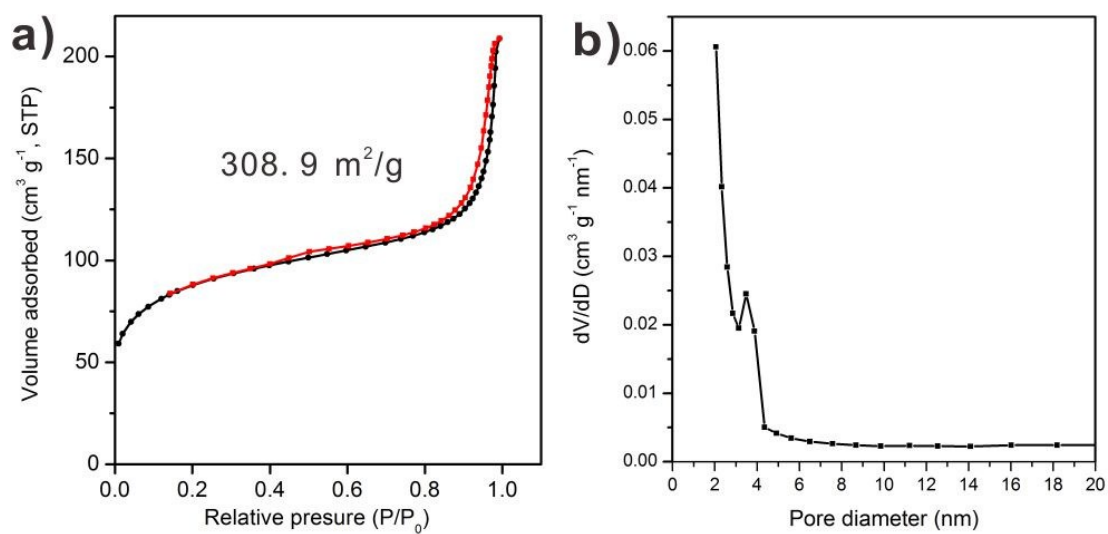

**Fig. S6. a)** N<sub>2</sub> adsorption–desorption isotherms and **b)** pore size distribution curve of Co@Co<sub>3</sub>O<sub>4</sub>-NC.

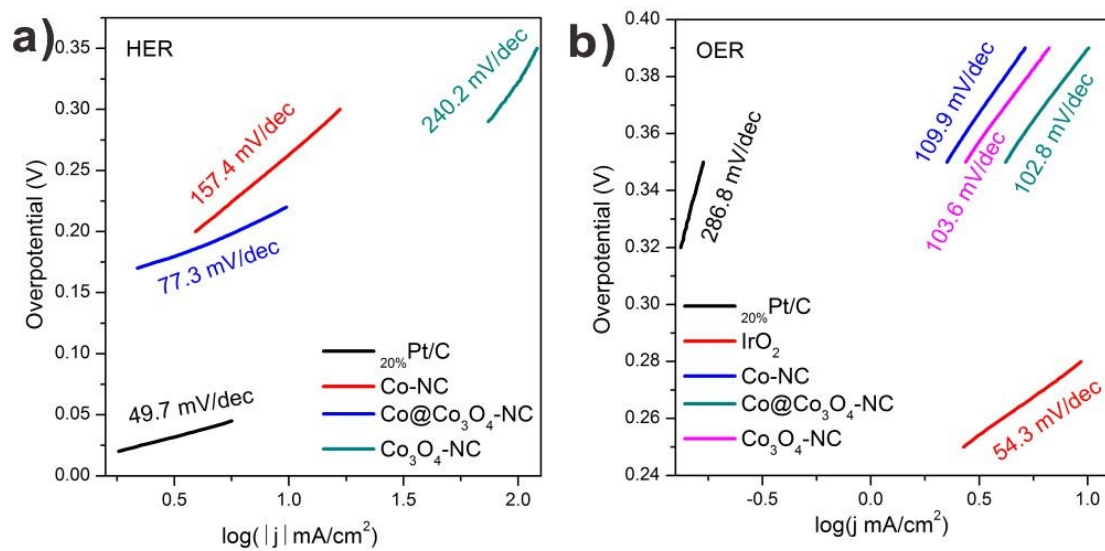

**Fig. S7. a) HER, b) OER Tafel plots of different catalysts.**

**Table S1.** Comparison of Co@Co<sub>3</sub>O<sub>4</sub>-NC with the reported various HER catalysts in alkaline electrolyte.

| Catalysts                                   | Overpotential<br>at 10 mA/cm <sup>-2</sup> | Reference                                   |
|---------------------------------------------|--------------------------------------------|---------------------------------------------|
| Co@Co <sub>3</sub> O <sub>4</sub> -NC       | 221                                        | In this work                                |
| NiFe-LDH                                    | 210 mV                                     | Science, <b>2014</b> , 345, 1593.           |
| N, O, P-Carbon                              | 450                                        | Energy Environ. Sci. <b>2016</b> , 9, 1210. |
| Ni <sub>2.5</sub> Co <sub>0.5</sub> Fe      | 275 mV                                     | J. Mater. Chem. A, <b>2016</b> , 4, 72450.  |
| MoO <sub>2</sub>                            | 124 mV                                     | Adv. Mater., <b>2016</b> , 28, 3785.        |
| CoOx@N-carbon                               | 243 mV                                     | J. Am. Chem. Soc. <b>2015</b> , 137, 2688.  |
| N, P-Carbon                                 | 470 mV                                     | Angew. Chem. <b>2016</b> , 128, 2270.       |
| g-C <sub>3</sub> N <sub>4</sub> @N-graphene | >600 mV                                    | Nat. Commun. <b>2014</b> , 5, 3783          |

**Table S2.** Comparison of Co@Co<sub>3</sub>O<sub>4</sub>-NC with the reported various OER catalysts in alkaline electrolyte.

| Catalysts                                 | Overpotential<br>at 10 mA/cm <sup>-2</sup> | Reference                                   |
|-------------------------------------------|--------------------------------------------|---------------------------------------------|
| Co@Co <sub>3</sub> O <sub>4</sub> -NC     | 391 mV                                     | In this work                                |
| NiFe-LDH                                  | 302 mV                                     | Nat. Commun. <b>2016</b> , 7, 11981.        |
| $\alpha$ -MnO <sub>2</sub>                | 490 mV                                     | J. Am. Chem. Soc. <b>2014</b> , 136, 11452. |
| N, S-graphene                             | 420 mV                                     | Nano Energy <b>2016</b> , 19, 373.          |
| NiCo <sub>2</sub> O <sub>4</sub>          | 290 mV                                     | Angew. Chem. Int. Ed. <b>2016</b> , 55, 1.  |
| g-C <sub>3</sub> N <sub>4</sub> -graphene | 580 mV                                     | ChemSusChem <b>2014</b> , 7, 2125.          |
| N-CNTs-CVD                                | 400 mV                                     | Small, <b>2014</b> , 10, 2251.              |
| B-CNTs-CVD                                | 600 mV                                     | Electrochim.Acta <b>2014</b> , 143, 291.    |
